# Supplementary material
Source: MDPI journal article supplement (https://www.mdpi.com/2073-4441/13/17/2380)
Supplement: s1 [file s1]

## Supplementary Materials

**Table S1.** LMWL slope of the  $\delta^2\text{H}$ – $\delta^{18}\text{O}$  linear relationship (in permille/permille) using multiple approaches for each sampling site during 2011–2014.

| Station    | $a + \sigma_a$  |                 |                 |                 |                 |                 |
|------------|-----------------|-----------------|-----------------|-----------------|-----------------|-----------------|
|            | OLSR            | RMA             | MA              | PWLSR           | PWRMA           | PWMA            |
| Anning     | $7.19 \pm 0.11$ | $7.36 \pm 0.11$ | $7.53 \pm 0.12$ | $7.46 \pm 0.10$ | $7.58 \pm 0.10$ | $7.70 \pm 0.10$ |
| Yuzhong    | $7.50 \pm 0.09$ | $7.63 \pm 0.09$ | $7.76 \pm 0.10$ | $7.62 \pm 0.09$ | $7.74 \pm 0.09$ | $7.85 \pm 0.09$ |
| Gaolan     | $7.47 \pm 0.17$ | $7.95 \pm 0.17$ | $8.44 \pm 0.18$ | $7.63 \pm 0.16$ | $8.06 \pm 0.16$ | $8.51 \pm 0.17$ |
| Yongdneg   | $7.14 \pm 0.11$ | $7.35 \pm 0.11$ | $7.57 \pm 0.11$ | $7.56 \pm 0.10$ | $7.75 \pm 0.10$ | $7.94 \pm 0.10$ |
| This study | $7.27 \pm 0.06$ | $7.51 \pm 0.06$ | $7.73 \pm 0.06$ | $7.55 \pm 0.05$ | $7.73 \pm 0.05$ | $7.91 \pm 0.05$ |

**Table S2.** LMWL intercept of the  $\delta^2\text{H}$ – $\delta^{18}\text{O}$  linear relationship (in permille) using multiple approaches for each sampling site during 2011–2014.

| Station    | $(b + \sigma_b)/\text{‰}$ |                 |                  |                 |                  |                  |
|------------|---------------------------|-----------------|------------------|-----------------|------------------|------------------|
|            | OLSR                      | RMA             | MA               | PWLSR           | PWRMA            | PWMA             |
| Anning     | $1.54 \pm 0.83$           | $2.38 \pm 0.83$ | $3.20 \pm 0.85$  | $6.15 \pm 0.76$ | $6.89 \pm 0.76$  | $7.61 \pm 0.77$  |
| Yuzhong    | $7.20 \pm 0.87$           | $8.19 \pm 0.87$ | $9.16 \pm 0.89$  | $8.91 \pm 0.84$ | $9.87 \pm 0.85$  | $10.81 \pm 0.85$ |
| Gaolan     | $5.94 \pm 1.17$           | $8.75 \pm 1.17$ | $11.65 \pm 1.25$ | $8.07 \pm 1.19$ | $10.79 \pm 1.21$ | $13.58 \pm 1.26$ |
| Yongdneg   | $4.96 \pm 0.72$           | $6.05 \pm 0.72$ | $7.12 \pm 0.74$  | $8.29 \pm 0.78$ | $9.54 \pm 0.79$  | $10.77 \pm 0.80$ |
| This study | $4.56 \pm 0.44$           | $6.03 \pm 0.45$ | $7.32 \pm 0.46$  | $7.87 \pm 0.44$ | $9.10 \pm 0.44$  | $10.32 \pm 0.45$ |

**Table S3.** Values of  $\text{rmSSE}_{\text{av}}$  using multiple approaches for each sampling site during 2011–2014.

| Station    | $\text{rmSSE}_{\text{av}}$ |          |          |          |          |          |
|------------|----------------------------|----------|----------|----------|----------|----------|
|            | OLSR                       | RMA      | MA       | PWLSR    | PWRMA    | PWMA     |
| Anning     | 1.0095                     | 1.0037   | 1.0094*  | 1.0000   | 1.0105*  | 1.0254** |
| Yuzhong    | 1.0070                     | 1.0028   | 1.0069   | 1.0014   | 1.0049*  | 1.0149** |
| Gaolan     | 1.0261                     | 1.0100*  | 1.0258   | 1.0138   | 1.0101*  | 1.0308** |
| Yongdeng   | 1.0122                     | 1.0048   | 1.0121** | 1.0000** | 1.0214** | 1.0522** |
| This study | 1.0123                     | 1.0048** | 1.0121** | 1.0006** | 1.0105** | 1.0288** |

Note: \*Passed the significance test of 0.05 level, \*\*Passed the significance test of 0.01 level.

**Table S4.** LMWL slope of the  $\delta^2\text{H}$ – $\delta^{18}\text{O}$  linear relationship (in permille/permille) using multiple approaches for each sampling site based on monthly samples during 2011–2014.

| Station    | $a + \sigma_a$  |                 |                 |                 |                 |                 |
|------------|-----------------|-----------------|-----------------|-----------------|-----------------|-----------------|
|            | OLSR            | RMA             | MA              | PWLSR           | PWRMA           | PWMA            |
| Anning     | $7.60 \pm 0.21$ | $7.69 \pm 0.20$ | $7.78 \pm 0.21$ | $7.42 \pm 0.21$ | $7.51 \pm 0.21$ | $7.60 \pm 0.21$ |
| Yuzhong    | $7.51 \pm 0.22$ | $7.62 \pm 0.21$ | $7.72 \pm 0.22$ | $7.71 \pm 0.16$ | $7.77 \pm 0.16$ | $7.82 \pm 0.16$ |
| Gaolan     | $8.05 \pm 0.67$ | $8.80 \pm 0.65$ | $9.60 \pm 0.73$ | $7.92 \pm 0.70$ | $8.75 \pm 0.72$ | $9.63 \pm 0.76$ |
| Yongdneg   | $7.30 \pm 0.29$ | $7.50 \pm 0.28$ | $7.70 \pm 0.30$ | $7.58 \pm 0.32$ | $7.81 \pm 0.32$ | $8.04 \pm 0.33$ |
| This study | $7.06 \pm 0.37$ | $7.38 \pm 0.36$ | $7.70 \pm 0.39$ | $7.01 \pm 0.34$ | $7.27 \pm 0.34$ | $7.53 \pm 0.3$  |

**Table S5.** LMWL intercept of the  $\delta^2\text{H}$ – $\delta^{18}\text{O}$  linear relationship (in permille) using multiple approaches for each sampling site based on monthly samples during 2011–2014.

| Station    | $(b + \sigma_b)/\text{‰}$ |                  |                  |                  |                  |                  |
|------------|---------------------------|------------------|------------------|------------------|------------------|------------------|
|            | OLSR                      | RMA              | MA               | PWLSR            | PWRMA            | PWMA             |
| Anning     | $4.88 \pm 1.74$           | $5.52 \pm 1.70$  | $6.15 \pm 1.77$  | $5.34 \pm 1.40$  | $5.87 \pm 1.41$  | $6.40 \pm 1.42$  |
| Yuzhong    | $7.40 \pm 2.00$           | $8.25 \pm 1.95$  | $9.09 \pm 2.03$  | $9.74 \pm 1.42$  | $10.18 \pm 1.42$ | $10.62 \pm 1.43$ |
| Gaolan     | $12.68 \pm 4.49$          | $17.37 \pm 4.35$ | $22.39 \pm 4.90$ | $10.17 \pm 4.58$ | $15.25 \pm 4.69$ | $20.71 \pm 5.04$ |
| Yongdeng   | $6.08 \pm 2.45$           | $7.53 \pm 2.38$  | $8.96 \pm 2.51$  | $8.36 \pm 2.19$  | $9.82 \pm 2.21$  | $11.27 \pm 2.26$ |
| This study | $5.29 \pm 2.26$           | $7.16 \pm 2.49$  | $9.03 \pm 2.67$  | $6.27 \pm 2.30$  | $7.92 \pm 2.33$  | $9.56 \pm 2.39$  |

**Table S6.** Values of rmSSEav using multiple approaches for each sampling site based on monthly samples during 2011–2014.

| Station    | rmSSEav |        |        |        |        |        |
|------------|---------|--------|--------|--------|--------|--------|
|            | OLSR    | RMA    | MA     | PWLSR  | PWRMA  | PWMA   |
| Anning     | 1.0049  | 1.0019 | 1.0049 | 1.0353 | 1.0143 | 1      |
| Yuzhong    | 1.0057  | 1.0023 | 1.0056 | 1      | 1.0041 | 1.0097 |
| Gaolan     | 1.0378  | 1.0143 | 1.0375 | 1.0465 | 1.0149 | 1.0384 |
| Yongdeng   | 1.0111  | 1.0044 | 1.011  | 1.0003 | 1.0141 | 1.0432 |
| This study | 1.018   | 1.007  | 1.0178 | 1.0183 | 1.0069 | 1.0104 |

**Table S7.** Meteoric water line slopes of the  $\delta^2\text{H}$ – $\delta^{18}\text{O}$  linear relationship (in permille/permille) for different seasons and sub regions using multiple approaches based on event-based samples during 2011–2014.

| Station    | Season | $a + \sigma_a$   |                  |                  |                  |                  |                  |
|------------|--------|------------------|------------------|------------------|------------------|------------------|------------------|
|            |        | OLSR             | RMA              | MA               | PWLSR            | PWRMA            | PWMA             |
| Anning     | Spring | $6.78 \pm 0.27$  | $6.93 \pm 0.26$  | $7.07 \pm 0.27$  | $7.27 \pm 0.30$  | $7.45 \pm 0.30$  | $7.62 \pm 0.31$  |
|            | Summer | $6.92 \pm 0.17$  | $7.12 \pm 0.17$  | $7.32 \pm 0.17$  | $7.35 \pm 0.14$  | $7.48 \pm 0.14$  | $7.61 \pm 0.14$  |
|            | Autumn | $7.59 \pm 0.26$  | $7.80 \pm 0.26$  | $8.00 \pm 0.27$  | $7.94 \pm 0.18$  | $8.03 \pm 0.18$  | $8.12 \pm 0.18$  |
|            | Winter | $9.70 \pm 0.48$  | $9.77 \pm 0.41$  | $9.84 \pm 0.48$  | $9.58 \pm 0.58$  | $9.69 \pm 0.58$  | $9.79 \pm 0.59$  |
| Yuzhong    | Spring | $7.20 \pm 0.34$  | $7.49 \pm 0.33$  | $7.79 \pm 0.36$  | $7.57 \pm 0.26$  | $7.74 \pm 0.26$  | $7.90 \pm 0.27$  |
|            | Summer | $7.31 \pm 0.15$  | $7.46 \pm 0.15$  | $7.61 \pm 0.16$  | $7.48 \pm 0.16$  | $7.63 \pm 0.16$  | $7.79 \pm 0.16$  |
|            | Autumn | $7.65 \pm 0.14$  | $7.74 \pm 0.14$  | $7.82 \pm 0.14$  | $7.68 \pm 0.13$  | $7.76 \pm 0.13$  | $7.83 \pm 0.13$  |
|            | Winter | $7.52 \pm 0.28$  | $7.60 \pm 0.26$  | $7.68 \pm 0.28$  | $8.01 \pm 0.25$  | $8.07 \pm 0.25$  | $8.13 \pm 0.25$  |
| Gaolan     | Spring | $8.31 \pm 0.27$  | $8.60 \pm 0.26$  | $8.88 \pm 0.28$  | $8.55 \pm 0.32$  | $8.95 \pm 0.33$  | $9.36 \pm 0.34$  |
|            | Summer | $7.30 \pm 0.24$  | $7.81 \pm 0.24$  | $8.33 \pm 0.26$  | $7.47 \pm 0.24$  | $7.94 \pm 0.24$  | $8.44 \pm 0.25$  |
|            | Autumn | $6.80 \pm 0.33$  | $7.15 \pm 0.33$  | $7.50 \pm 0.35$  | $7.63 \pm 0.25$  | $7.81 \pm 0.25$  | $7.99 \pm 0.26$  |
|            | Winter | $1.20 \pm 0.10$  | $1.25 \pm 0.10$  | $1.26 \pm 0.11$  | $1.23 \pm 0.07$  | $1.25 \pm 0.07$  | $1.25 \pm 0.07$  |
| Yongdeng   | Spring | $6.78 \pm 0.34$  | $7.20 \pm 0.33$  | $7.63 \pm 0.36$  | $6.64 \pm 0.33$  | $7.03 \pm 0.33$  | $7.43 \pm 0.34$  |
|            | Summer | $7.18 \pm 0.13$  | $7.36 \pm 0.13$  | $7.54 \pm 0.13$  | $7.71 \pm 0.11$  | $7.83 \pm 0.11$  | $7.95 \pm 0.12$  |
|            | Autumn | $7.61 \pm 0.18$  | $7.75 \pm 0.17$  | $7.89 \pm 0.18$  | $7.74 \pm 0.17$  | $7.87 \pm 0.17$  | $8.01 \pm 0.18$  |
|            | Winter | $10.34 \pm 1.48$ | $10.75 \pm 1.21$ | $11.18 \pm 1.54$ | $10.83 \pm 1.19$ | $11.09 \pm 1.20$ | $11.35 \pm 1.22$ |
| This study | Spring | $7.28 \pm 0.16$  | $7.61 \pm 0.16$  | $7.95 \pm 0.17$  | $7.31 \pm 0.15$  | $7.59 \pm 0.15$  | $7.88 \pm 0.16$  |
|            | Summer | $7.11 \pm 0.09$  | $7.35 \pm 0.09$  | $7.59 \pm 0.09$  | $7.48 \pm 0.08$  | $7.67 \pm 0.08$  | $7.86 \pm 0.08$  |
|            | Autumn | $7.59 \pm 0.10$  | $7.76 \pm 0.10$  | $7.92 \pm 0.11$  | $7.82 \pm 0.09$  | $7.93 \pm 0.09$  | $8.04 \pm 0.09$  |
|            | Winter | $7.64 \pm 0.26$  | $7.83 \pm 0.25$  | $8.02 \pm 0.27$  | $7.67 \pm 0.30$  | $7.93 \pm 0.30$  | $8.18 \pm 0.31$  |

**Table S8.** Meteoric water line intercepts of the  $\delta^2\text{H}$ – $\delta^{18}\text{O}$  linear relationship (in permille) for different seasons and sub regions using multiple approaches based on event-based samples during 2011–2014.

| Station    | Season | $(b + \sigma_b)/\text{‰}$ |                   |                   |                   |                   |                   |
|------------|--------|---------------------------|-------------------|-------------------|-------------------|-------------------|-------------------|
|            |        | OLSR                      | RMA               | MA                | PWLSR             | PWRMA             | PWMA              |
| Anning     | Spring | $1.67 \pm 1.74$           | $2.47 \pm 1.68$   | $3.26 \pm 1.77$   | $7.10 \pm 1.73$   | $7.95 \pm 1.74$   | $8.80 \pm 1.77$   |
|            | Summer | $-0.03 \pm 1.02$          | $0.59 \pm 1.01$   | $1.22 \pm 1.05$   | $4.66 \pm 1.04$   | $5.35 \pm 1.05$   | $6.03 \pm 1.06$   |
|            | Autumn | $4.58 \pm 2.10$           | $5.96 \pm 2.06$   | $7.33 \pm 2.15$   | $10.39 \pm 1.67$  | $11.16 \pm 1.67$  | $11.91 \pm 1.68$  |
|            | Winter | $35.01 \pm 7.27$          | $36.02 \pm 6.30$  | $37.02 \pm 7.32$  | $33.24 \pm 7.56$  | $34.55 \pm 7.58$  | $35.84 \pm 7.64$  |
| Yuzhong    | Spring | $7.81 \pm 2.76$           | $9.95 \pm 2.69$   | $12.09 \pm 2.87$  | $10.67 \pm 2.27$  | $11.98 \pm 2.28$  | $13.28 \pm 2.31$  |
|            | Summer | $6.14 \pm 1.27$           | $7.10 \pm 1.26$   | $8.05 \pm 1.29$   | $8.10 \pm 1.32$   | $9.19 \pm 1.33$   | $10.27 \pm 1.35$  |
|            | Autumn | $7.90 \pm 1.39$           | $8.60 \pm 1.37$   | $9.28 \pm 1.40$   | $8.15 \pm 1.40$   | $8.84 \pm 1.41$   | $9.51 \pm 1.42$   |
|            | Winter | $4.87 \pm 3.84$           | $5.86 \pm 3.63$   | $6.82 \pm 3.88$   | $11.50 \pm 3.95$  | $12.40 \pm 3.95$  | $13.28 \pm 3.98$  |
| Gaolan     | Spring | $11.83 \pm 1.58$          | $13.20 \pm 1.56$  | $14.58 \pm 1.63$  | $12.94 \pm 1.90$  | $14.96 \pm 1.92$  | $17.02 \pm 1.98$  |
|            | Summer | $2.94 \pm 1.76$           | $5.97 \pm 1.76$   | $9.11 \pm 1.88$   | $5.82 \pm 1.84$   | $8.94 \pm 1.87$   | $12.16 \pm 1.96$  |
|            | Autumn | $5.95 \pm 2.30$           | $8.14 \pm 2.26$   | $10.35 \pm 2.42$  | $11.73 \pm 2.10$  | $13.08 \pm 2.11$  | $14.43 \pm 2.15$  |
|            | Winter | $-50.44 \pm 0.88$         | $-50.00 \pm 0.82$ | $-49.90 \pm 0.90$ | $-50.26 \pm 0.54$ | $-50.09 \pm 0.54$ | $-50.05 \pm 0.54$ |
| Yongdeng   | Spring | $5.63 \pm 2.22$           | $7.75 \pm 2.19$   | $9.92 \pm 2.35$   | $6.07 \pm 2.46$   | $8.80 \pm 2.49$   | $11.59 \pm 2.60$  |
|            | Summer | $2.75 \pm 0.76$           | $3.44 \pm 0.76$   | $4.12 \pm 0.78$   | $6.67 \pm 0.83$   | $7.43 \pm 0.84$   | $8.17 \pm 0.85$   |
|            | Autumn | $11.72 \pm 1.40$          | $12.67 \pm 1.38$  | $13.60 \pm 1.43$  | $12.53 \pm 1.40$  | $13.48 \pm 1.40$  | $14.42 \pm 1.42$  |
|            | Winter | $44.88 \pm 21.28$         | $50.82 \pm 17.38$ | $56.91 \pm 22.13$ | $50.41 \pm 17.82$ | $54.25 \pm 17.92$ | $58.13 \pm 18.24$ |
| This study | Spring | $7.11 \pm 1.07$           | $8.92 \pm 1.07$   | $10.75 \pm 1.12$  | $8.49 \pm 1.07$   | $10.29 \pm 1.09$  | $12.11 \pm 1.12$  |
|            | Summer | $2.38 \pm 0.58$           | $3.54 \pm 0.58$   | $4.70 \pm 0.60$   | $6.26 \pm 0.60$   | $7.46 \pm 0.60$   | $8.64 \pm 0.62$   |

|        |             |              |              |              |              |              |
|--------|-------------|--------------|--------------|--------------|--------------|--------------|
| Autumn | 8.83 ± 0.88 | 10.00 ± 0.87 | 11.15 ± 0.90 | 11.26 ± 0.80 | 12.14 ± 0.80 | 13.01 ± 0.81 |
| Winter | 5.22 ± 3.34 | 7.47 ± 3.27  | 9.71 ± 3.42  | 4.55 ± 4.15  | 7.86 ± 4.18  | 11.18 ± 4.28 |

**Table S9.** Values of rmSSEav for different seasons and sub regions using multiple approaches based on event-based samples during 2011–2014.

| Station    | Season | rmSSEav |         |          |          |          |          |
|------------|--------|---------|---------|----------|----------|----------|----------|
|            |        | OLSR    | RMA     | MA       | PWLSR    | PWRMA    | PWMA     |
| Aning      | Spring | 1.0089  | 1.0035  | 1.0088   | 1.0000   | 1.0168   | 1.0428   |
|            | Summer | 1.0118  | 1.0046  | 1.0116   | 1.0000   | 1.0203*  | 1.0446*  |
|            | Autumn | 1.0111  | 1.0043  | 1.0109   | 1.0000   | 1.0116   | 1.0248   |
|            | Winter | 1.0029  | 1.0012  | 1.0029   | 1.0103   | 1.0014   | 1.0024   |
| Yuzhong    | Spring | 1.0167  | 1.0065  | 1.0165   | 1.0014   | 1.0078   | 1.0197   |
|            | Summer | 1.0082  | 1.0032  | 1.0081   | 1.0008   | 1.0084   | 1.0256*  |
|            | Autumn | 1.0046  | 1.0018  | 1.0045   | 1.0024   | 1.0017   | 1.0050   |
|            | Winter | 1.0044  | 1.0017  | 1.0043   | 1.0000   | 1.0191   | 1.0397   |
| Gaolan     | Spring | 1.0138  | 1.0054  | 1.0137   | 1.0033   | 1.0160   | 1.0583*  |
|            | Summer | 1.0282  | 1.0108  | 1.0279** | 1.0141   | 1.0112   | 1.0366** |
|            | Autumn | 1.0207  | 1.0080  | 1.0205   | 1.0000   | 1.0206*  | 1.0461*  |
|            | Winter | 1.0089  | 1.0037  | 1.0055   | 1.0015   | 1.0025   | 1.0032   |
| Yongdeng   | Spring | 1.0251  | 1.0096  | 1.0248   | 1.0232   | 1.0085   | 1.0252   |
|            | Summer | 1.0100  | 1.0039  | 1.0099*  | 1.0000** | 1.0250** | 1.0540** |
|            | Autumn | 1.0076  | 1.0030  | 1.0075   | 1.0017   | 1.0050   | 1.0160   |
|            | Winter | 1.0166  | 1.0065  | 1.0165   | 1.0081   | 1.0052   | 1.0101   |
| This study | Spring | 1.0184  | 1.0071  | 1.0182** | 1.0122   | 1.0070   | 1.0186*  |
|            | Summer | 1.0137  | 1.0053* | 1.0135** | 1.0000** | 1.0171** | 1.0426** |
|            | Autumn | 1.0089  | 1.0035  | 1.0088*  | 1.0000   | 1.0067*  | 1.0174** |
|            | Winter | 1.0103  | 1.0040  | 1.0101   | 1.0095   | 1.0034   | 1.0194   |

Note: \*Passed the significance test of 0.05 level, \*\*Passed the significance test of 0.01 level.

**Table S10.** Meteoric water line slopes of the  $\delta^2\text{H}$ – $\delta^{18}\text{O}$  linear relationship (in permille/permille) for different seasons and sub regions using multiple approaches based on monthly samples during 2011–2014.

| Station    | Season | $a + \sigma_a$ |              |              |              |              |              |
|------------|--------|----------------|--------------|--------------|--------------|--------------|--------------|
|            |        | OLSR           | RMA          | MA           | PWLSR        | PWRMA        | PWMA         |
| Anning     | Spring | 7.68 ± 0.62    | 7.86 ± 0.55  | 8.03 ± 0.63  | 7.76 ± 0.52  | 7.87 ± 0.52  | 7.99 ± 0.52  |
|            | Summer | 7.28 ± 0.41    | 7.38 ± 0.37  | 7.48 ± 0.41  | 7.16 ± 0.41  | 7.27 ± 0.41  | 7.37 ± 0.41  |
|            | Autumn | 6.66 ± 0.69    | 6.91 ± 0.61  | 7.16 ± 0.72  | 8.23 ± 0.43  | 8.31 ± 0.42  | 8.31 ± 0.42  |
|            | Winter | 8.61 ± 0.45    | 8.66 ± 0.37  | 8.70 ± 0.45  | 8.40 ± 0.37  | 8.43 ± 0.37  | 8.46 ± 0.37  |
| Yuzhong    | Spring | 7.51 ± 0.45    | 7.57 ± 0.38  | 7.64 ± 0.45  | 7.43 ± 0.57  | 7.53 ± 0.56  | 7.63 ± 0.56  |
|            | Summer | 7.61 ± 0.29    | 7.66 ± 0.27  | 7.72 ± 0.30  | 7.54 ± 0.25  | 7.58 ± 0.25  | 7.62 ± 0.25  |
|            | Autumn | 7.71 ± 0.38    | 7.80 ± 0.34  | 7.88 ± 0.38  | 7.71 ± 0.29  | 7.76 ± 0.29  | 7.81 ± 0.30  |
|            | Winter | 6.78 ± 0.31    | 6.80 ± 0.22  | 6.81 ± 0.31  | 6.83 ± 0.39  | 6.86 ± 0.39  | 6.88 ± 0.39  |
| Gaolan     | Spring | 8.10 ± 1.03    | 8.51 ± 0.91  | 9.00 ± 1.09  | 7.73 ± 1.21  | 8.37 ± 1.24  | 9.05 ± 1.31  |
|            | Summer | 8.21 ± 1.06    | 8.87 ± 0.97  | 9.56 ± 1.14  | 8.34 ± 1.23  | 9.07 ± 1.15  | 9.85 ± 1.22  |
|            | Autumn | 7.82 ± 4.81    | 10.36 ± 3.40 | 13.68 ± 6.35 | 10.56 ± 3.37 | 11.59 ± 3.44 | 12.70 ± 3.69 |
|            | Winter | 0.99 ± 0.28    | 1.03 ± 0.15  | 1.03 ± 0.26  | 1.11 ± 0.08  | 1.11 ± 0.08  | 1.11 ± 0.08  |
| Yongdeng   | Spring | 6.63 ± 0.78    | 6.99 ± 0.70  | 7.35 ± 0.82  | 5.99 ± 0.81  | 6.42 ± 0.83  | 6.85 ± 0.87  |
|            | Summer | 7.92 ± 0.61    | 8.15 ± 0.55  | 8.37 ± 0.62  | 8.08 ± 0.46  | 8.21 ± 0.46  | 8.34 ± 0.46  |
|            | Autumn | 7.84 ± 0.31    | 7.90 ± 0.28  | 7.95 ± 0.31  | 7.74 ± 0.38  | 7.83 ± 0.38  | 7.91 ± 0.39  |
|            | Winter | 10.97 ± 1.03   | 11.12 ± 0.80 | 11.26 ± 1.04 | 11.61 ± 0.73 | 11.68 ± 0.74 | 11.75 ± 0.74 |
| This study | Spring | 7.06 ± 0.37    | 7.38 ± 0.36  | 7.70 ± 0.49  | 7.01 ± 0.34  | 7.27 ± 0.34  | 7.53 ± 0.35  |
|            | Summer | 7.49 ± 0.29    | 7.74 ± 0.28  | 7.98 ± 0.30  | 7.52 ± 0.25  | 7.70 ± 0.25  | 7.88 ± 0.25  |
|            | Autumn | 7.59 ± 0.28    | 7.76 ± 0.27  | 7.92 ± 0.28  | 8.01 ± 0.19  | 8.08 ± 0.19  | 8.15 ± 0.19  |
|            | Winter | 7.76 ± 0.36    | 7.90 ± 0.34  | 8.03 ± 0.37  | 7.55 ± 0.33  | 7.67 ± 0.34  | 7.78 ± 0.3   |

**Table S11.** Meteoric water line intercepts the  $\delta^2\text{H}$ – $\delta^{18}\text{O}$  linear relationship (in permille) for different seasons and sub regions using multiple approaches based on monthly samples during 2011–2014.

| Station    | Season | $(b + \sigma_b)/\text{‰}$ |                   |                   |                   |                   |                   |
|------------|--------|---------------------------|-------------------|-------------------|-------------------|-------------------|-------------------|
|            |        | OLSR                      | RMA               | MA                | PWLSR             | PWRMA             | PWMA              |
| Anning     | Spring | $6.13 \pm 3.49$           | $6.97 \pm 3.08$   | $7.80 \pm 3.56$   | $8.66 \pm 2.85$   | $9.23 \pm 2.86$   | $9.79 \pm 2.90$   |
|            | Summer | $2.19 \pm 2.62$           | $2.70 \pm 2.37$   | $3.20 \pm 2.65$   | $3.22 \pm 2.50$   | $3.71 \pm 2.50$   | $4.19 \pm 2.53$   |
|            | Autumn | $-1.41 \pm 5.49$          | $0.39 \pm 4.84$   | $2.19 \pm 5.68$   | $12.38 \pm 3.71$  | $13.02 \pm 3.72$  | $13.64 \pm 3.74$  |
|            | Winter | $18.27 \pm 6.32$          | $18.89 \pm 5.16$  | $19.49 \pm 6.35$  | $16.75 \pm 5.35$  | $17.20 \pm 5.36$  | $17.63 \pm 5.37$  |
| Yuzhong    | Spring | $9.94 \pm 3.40$           | $10.40 \pm 2.88$  | $10.86 \pm 3.43$  | $9.48 \pm 4.66$   | $10.31 \pm 4.68$  | $11.12 \pm 4.72$  |
|            | Summer | $9.84 \pm 2.30$           | $10.24 \pm 2.10$  | $10.63 \pm 2.32$  | $8.76 \pm 2.00$   | $9.06 \pm 2.01$   | $9.36 \pm 2.02$   |
|            | Autumn | $9.27 \pm 3.99$           | $10.06 \pm 3.61$  | $10.83 \pm 4.04$  | $7.72 \pm 3.20$   | $8.22 \pm 3.21$   | $8.71 \pm 3.22$   |
|            | Winter | $-8.36 \pm 3.96$          | $-8.19 \pm 2.80$  | $-8.03 \pm 3.97$  | $-8.28 \pm 6.06$  | $-7.95 \pm 6.06$  | $-7.62 \pm 6.08$  |
| Gaolan     | Spring | $13.65 \pm 6.08$          | $16.11 \pm 5.37$  | $18.64 \pm 6.40$  | $8.68 \pm 6.81$   | $12.06 \pm 6.94$  | $15.62 \pm 7.36$  |
|            | Summer | $10.66 \pm 6.95$          | $14.57 \pm 6.36$  | $18.68 \pm 7.49$  | $10.99 \pm 7.48$  | $15.51 \pm 7.64$  | $20.31 \pm 8.12$  |
|            | Autumn | $16.51 \pm 33.09$         | $33.94 \pm 23.41$ | $56.69 \pm 43.70$ | $33.92 \pm 25.58$ | $41.68 \pm 26.16$ | $50.07 \pm 28.02$ |
|            | Winter | $-52.06 \pm 2.18$         | $-51.78 \pm 1.26$ | $-51.77 \pm 2.18$ | $-51.19 \pm 0.66$ | $-51.16 \pm 0.65$ | $-51.16 \pm 0.65$ |
| Yongdneg   | Spring | $0.89 \pm 6.36$           | $3.23 \pm 5.68$   | $5.59 \pm 6.65$   | $1.10 \pm 5.92$   | $4.07 \pm 6.02$   | $7.11 \pm 6.33$   |
|            | Summer | $7.61 \pm 3.26$           | $8.72 \pm 2.98$   | $9.83 \pm 3.35$   | $9.01 \pm 2.89$   | $9.75 \pm 2.90$   | $10.48 \pm 2.93$  |
|            | Autumn | $14.94 \pm 2.72$          | $14.38 \pm 2.46$  | $14.82 \pm 2.73$  | $11.86 \pm 2.78$  | $12.44 \pm 2.79$  | $13.01 \pm 2.81$  |
|            | Winter | $54.07 \pm 14.16$         | $56.04 \pm 10.97$ | $58.00 \pm 14.34$ | $62.35 \pm 10.88$ | $63.38 \pm 10.90$ | $64.39 \pm 10.94$ |
| This study | Spring | $5.29 \pm 2.56$           | $7.16 \pm 2.49$   | $9.03 \pm 2.67$   | $6.27 \pm 2.31$   | $7.92 \pm 2.33$   | $9.56 \pm 2.39$   |
|            | Summer | $6.09 \pm 1.92$           | $7.52 \pm 1.88$   | $8.94 \pm 1.98$   | $6.50 \pm 1.69$   | $7.59 \pm 1.70$   | $8.66 \pm 1.73$   |
|            | Autumn | $9.37 \pm 2.50$           | $10.73 \pm 2.43$  | $12.08 \pm 2.55$  | $12.27 \pm 1.67$  | $12.87 \pm 1.67$  | $13.46 \pm 1.68$  |
|            | Winter | $6.77 \pm 4.65$           | $8.39 \pm 4.38$   | $9.98 \pm 4.73$   | $2.27 \pm 4.62$   | $3.82 \pm 4.63$   | $5.34 \pm 4.68$   |

**Table S12.** Values of  $\text{rmSSE}_{\text{av}}$  for different seasons and sub regions using multiple approaches based on monthly samples during 2011–2014.

| Station    | Season | $\text{rmSSE}_{\text{av}}$ |        |        |        |        |        |
|------------|--------|----------------------------|--------|--------|--------|--------|--------|
|            |        | OLSR                       | RMA    | MA     | PWLSR  | PWRMA  | PWMA   |
| Anning     | Spring | 1.0091                     | 1.0036 | 1.009  | 1.0073 | 1.0035 | 1.0041 |
|            | Summer | 1.0056                     | 1.0022 | 1.0055 | 1.0203 | 1.0067 | 1.0001 |
|            | Autumn | 1.015                      | 1.0058 | 1.0148 | 1      | 1.0175 | 1.035  |
|            | Winter | 1.0022                     | 1.0009 | 1.0022 | 1.0145 | 1.0066 | 1      |
| Yuzhong    | Spring | 1.0036                     | 1.0014 | 1.0036 | 1.0088 | 1.0009 | 1.0047 |
|            | Summer | 1.003                      | 1.0012 | 1.003  | 1.0089 | 1.0034 | 1      |
|            | Autumn | 1.0043                     | 1.0017 | 1.0043 | 1.0062 | 1.0023 | 1.0004 |
|            | Winter | 1.0008                     | 1.0003 | 1.0008 | 1.0016 | 1      | 1.0018 |
| Gaolan     | Spring | 1.0224                     | 1.0087 | 1.0222 | 1.0445 | 1.011  | 1.0244 |
|            | Summer | 1.0326                     | 1.0124 | 1.0323 | 1.024  | 1.0125 | 1.0484 |
|            | Autumn | 1.1323                     | 1.0445 | 1.1323 | 1.0389 | 1.017  | 1.0384 |
|            | Winter | 1.0054                     | 1.0027 | 1.0029 | 1      | 1.0086 | 1.0094 |
| Yongdneg   | Spring | 1.0216                     | 1.0083 | 1.0213 | 1.0923 | 1.0288 | 1.0022 |
|            | Summer | 1.0117                     | 1.0046 | 1.0116 | 1.0013 | 1.0051 | 1.0135 |
|            | Autumn | 1.0029                     | 1.0011 | 1.0028 | 1.0016 | 1.0021 | 1.0098 |
|            | Winter | 1.0054                     | 1.0021 | 1.0054 | 1      | 1.0068 | 1.0152 |
| This study | Spring | 1.018                      | 1.007  | 1.0178 | 1.0183 | 1.0069 | 1.010  |
|            | Summer | 1.018                      | 1.007  | 1.0178 | 1.0183 | 1.0069 | 1.0104 |
|            | Autumn | 1.0134                     | 1.0052 | 1.0133 | 1.0102 | 1.0048 | 1.0079 |
|            | Winter | 1.0089                     | 1.0035 | 1.0088 | 1      | 1.0074 | 1.0162 |

**Table S13.** LMWL slope of the  $\delta^2\text{H}$ – $\delta^{18}\text{O}$  linear relationship (in permille/permille) ( $a + \sigma_a$ ) under the precipitation amount ( $P$  in mm) condition using six regressions based on event-based samples in the Lanzhou city from 2011 to 2014.

| $P$ (mm)         | Slope (permille/permille) |                 |                   |                 |                 |                      | $n$ |
|------------------|---------------------------|-----------------|-------------------|-----------------|-----------------|----------------------|-----|
|                  | OLSR                      | RMA             | MA                | PWLSR           | PWRMA           | PWMA                 |     |
| $0 < P < 0.5$    | $7.13 \pm 0.13$           | $7.38 \pm 0.13$ | $7.62 \pm 0.14^*$ | $7.14 \pm 0.14$ | $7.42 \pm 0.14$ | $7.71 \pm 0.15^{**}$ | 207 |
| $0.5 \leq P < 1$ | $7.17 \pm 0.16$           | $7.38 \pm 0.15$ | $7.58 \pm 0.16$   | $7.16 \pm 0.15$ | $7.36 \pm 0.15$ | $7.56 \pm 0.16$      | 126 |
| $1 \leq P < 2$   | $7.21 \pm 0.15$           | $7.48 \pm 0.15$ | $7.75 \pm 0.15^*$ | $7.29 \pm 0.14$ | $7.54 \pm 0.14$ | $7.78 \pm 0.14^{**}$ | 187 |
| $2 \leq P < 5$   | $7.37 \pm 0.11$           | $7.56 \pm 0.11$ | $7.75 \pm 0.11^*$ | $7.35 \pm 0.11$ | $7.53 \pm 0.11$ | $7.70 \pm 0.11^*$    | 233 |
| $P \geq 5$       | $7.80 \pm 0.12$           | $7.98 \pm 0.12$ | $8.16 \pm 0.12^*$ | $7.81 \pm 0.11$ | $7.98 \pm 0.11$ | $8.14 \pm 0.12^*$    | 207 |

Note: \*Passed the significance test of 0.05 level, \*\*Passed the significance test of 0.01 level.

**Table S14.** LMWL slope of the  $\delta^2\text{H}$ – $\delta^{18}\text{O}$  linear relationship (in permille/permille) ( $a + \sigma_a$ ) under the air temperature ( $T$  in  $^{\circ}\text{C}$ ) condition using six regressions based on event-based samples in the Lanzhou city from 2011 to 2014.

| $T$ ( $^{\circ}\text{C}$ ) | Slope (permille/permille) |                      |                      |                      |                      |                      | $n$ |
|----------------------------|---------------------------|----------------------|----------------------|----------------------|----------------------|----------------------|-----|
|                            | OLSR                      | RMA                  | MA                   | PWLSR                | PWRMA                | PWMA                 |     |
| $T < 0$                    | $7.62 \pm 0.16$           | $7.78 \pm 0.15$      | $7.95 \pm 0.16$      | $7.72 \pm 0.14$      | $7.86 \pm 0.14$      | $7.99 \pm 0.15$      | 107 |
| $0 \leq T < 10$            | $7.01 \pm 0.16$           | $7.30 \pm 0.16$      | $7.60 \pm 0.16^*$    | $7.23 \pm 0.13$      | $7.44 \pm 0.14$      | $7.64 \pm 0.14^{**}$ | 173 |
| $10 \leq T < 20$           | $7.38 \pm 0.07$           | $7.58 \pm 0.07^{**}$ | $7.78 \pm 0.07^{**}$ | $7.69 \pm 0.07^{**}$ | $7.87 \pm 0.07^{**}$ | $8.07 \pm 0.07^{**}$ | 569 |
| $T \geq 20$                | $7.10 \pm 0.21$           | $7.40 \pm 0.21$      | $7.71 \pm 0.22^*$    | $7.26 \pm 0.14$      | $7.39 \pm 0.14$      | $7.51 \pm 0.14$      | 102 |

Note: \*Passed the significance test of 0.05 level, \*\*Passed the significance test of 0.01 level.

**Table S15.** LMWL slope of the  $\delta^2\text{H}$ – $\delta^{18}\text{O}$  linear relationship (in permille/permille) ( $a + \sigma_a$ ) under the relative humidity ( $RH$  in %) condition using six regressions based on event-based samples in the Lanzhou city from 2011 to 2014.

| $RH$ (%)           | Slope (permille/permille) |                 |                   |                 |                      |                      | $n$ |
|--------------------|---------------------------|-----------------|-------------------|-----------------|----------------------|----------------------|-----|
|                    | OLSR                      | RMA             | MA                | PWLSR           | PWRMA                | PWMA                 |     |
| $0 < RH < 60$      | $6.88 \pm 0.17$           | $7.18 \pm 0.17$ | $7.48 \pm 0.18^*$ | $6.92 \pm 0.14$ | $7.12 \pm 0.14$      | $7.32 \pm 0.15$      | 143 |
| $60 \leq RH < 70$  | $6.90 \pm 0.18$           | $7.20 \pm 0.18$ | $7.50 \pm 0.19^*$ | $7.08 \pm 0.19$ | $7.38 \pm 0.19$      | $7.69 \pm 0.19^{**}$ | 129 |
| $70 \leq RH < 80$  | $7.34 \pm 0.11$           | $7.55 \pm 0.12$ | $7.76 \pm 0.12^*$ | $7.67 \pm 0.11$ | $7.82 \pm 0.11^{**}$ | $7.07 \pm 0.11^{**}$ | 234 |
| $80 \leq RH < 90$  | $7.73 \pm 0.09$           | $7.90 \pm 0.09$ | $8.06 \pm 0.10^*$ | $7.76 \pm 0.11$ | $7.94 \pm 0.10$      | $8.11 \pm 0.10^{**}$ | 298 |
| $90 \leq RH < 100$ | $7.51 \pm 0.16$           | $7.77 \pm 0.16$ | $8.04 \pm 0.17^*$ | $7.74 \pm 0.13$ | $7.91 \pm 0.13$      | $8.08 \pm 0.13^*$    | 155 |

Note: \*Passed the significance test of 0.05 level, \*\*Passed the significance test of 0.01 level.

**Table S16.** LMWL slope of the  $\delta^2\text{H}$ – $\delta^{18}\text{O}$  linear relationship (in permille/permille) ( $a + \sigma_a$ ) under the water vapor pressure ( $e$  in %) condition using six regressions based on event-based samples in the Lanzhou city from 2011 to 2014.

| $e$ (%)          | Slope (permille/permille) |                 |                      |                   |                      |                      | $n$ |
|------------------|---------------------------|-----------------|----------------------|-------------------|----------------------|----------------------|-----|
|                  | OLSR                      | RMA             | MA                   | PWLSR             | PWRMA                | PWMA                 |     |
| $0 < e < 5$      | $7.77 \pm 0.17$           | $7.94 \pm 0.17$ | $8.11 \pm 0.18^*$    | $7.67 \pm 0.16$   | $7.81 \pm 0.16$      | $7.96 \pm 0.17$      | 88  |
| $5 \leq e < 10$  | $7.09 \pm 0.16$           | $7.43 \pm 0.15$ | $7.77 \pm 0.16^{**}$ | $6.95 \pm 0.15$   | $7.29 \pm 0.15$      | $7.63 \pm 0.16^*$    | 209 |
| $10 \leq e < 15$ | $7.20 \pm 0.09$           | $7.41 \pm 0.09$ | $7.62 \pm 0.09^{**}$ | $7.49 \pm 0.08^*$ | $7.66 \pm 0.08^{**}$ | $7.83 \pm 0.09^{**}$ | 383 |
| $15 \leq e < 25$ | $7.24 \pm 0.12$           | $7.50 \pm 0.12$ | $7.76 \pm 0.13^{**}$ | $7.80 \pm 0.09^*$ | $7.95 \pm 0.09^{**}$ | $8.10 \pm 0.10^{**}$ | 265 |

Note: \*Passed the significance test of 0.05 level, \*\*Passed the significance test of 0.01 level.

**Table S17.** LMWL slope of the  $\delta^2\text{H}$ – $\delta^{18}\text{O}$  linear relationship (in permille/permille) ( $a + \sigma_a$ ) under the dew point temperature ( $T_d$  in  $^{\circ}\text{C}$ ) condition using six regressions based on event-based samples in the Lanzhou city from 2011 to 2014.

| $T_d$ ( $^{\circ}\text{C}$ ) | Slope (permille/permille) |                 |                      |                      |                      |                      | $n$ |
|------------------------------|---------------------------|-----------------|----------------------|----------------------|----------------------|----------------------|-----|
|                              | OLSR                      | RMA             | MA                   | PWLSR                | PWRMA                | PWMA                 |     |
| $T_d < 0$                    | $7.79 \pm 0.17$           | $7.98 \pm 0.17$ | $8.18 \pm 0.17$      | $7.64 \pm 0.16$      | $7.84 \pm 0.17$      | $8.03 \pm 0.17$      | 112 |
| $0 \leq T_d < 10$            | $7.79 \pm 0.11$           | $7.47 \pm 0.11$ | $7.75 \pm 0.12^{**}$ | $7.44 \pm 0.10$      | $7.67 \pm 0.09^{**}$ | $7.89 \pm 0.09$      | 329 |
| $10 \leq T_d < 20$           | $7.15 \pm 0.09$           | $7.35 \pm 0.09$ | $7.54 \pm 0.09^{**}$ | $7.54 \pm 0.08^{**}$ | $7.69 \pm 0.08^{**}$ | $7.83 \pm 0.08^{**}$ | 392 |
| $T_d > 20$                   | $7.21 \pm 0.19$           | $7.46 \pm 0.19$ | $7.71 \pm 0.20$      | $7.65 \pm 0.17$      | $7.83 \pm 0.17^*$    | $8.01 \pm 0.17^{**}$ | 101 |

Note: \*Passed the significance test of 0.05 level, \*\*Passed the significance test of 0.01 level.

**Table S18.** LMWL slope of the  $\delta^2\text{H}$ – $\delta^{18}\text{O}$  linear relationship (in permille/permille) ( $a + \sigma_a$ ) under the depression of the dew point ( $\Delta T_d$  in  $^{\circ}\text{C}$ ) condition using six regressions based on event-based samples in the Lanzhou city from 2011 to 2014.

| $\Delta T_d$ ( $^{\circ}\text{C}$ ) | Slope (permille/permille) |                 |                      |                 |                      |                      | n   |
|-------------------------------------|---------------------------|-----------------|----------------------|-----------------|----------------------|----------------------|-----|
|                                     | OLSR                      | RMA             | MA                   | PWLSR           | PWRMA                | PWMA                 |     |
| $\Delta T_d < 2$                    | $7.67 \pm 0.14$           | $7.90 \pm 0.14$ | $8.13 \pm 0.14^*$    | $7.82 \pm 0.10$ | $7.95 \pm 0.10$      | $8.07 \pm 0.10^*$    | 193 |
| $2 \leq \Delta T_d < 4$             | $7.67 \pm 0.09$           | $7.83 \pm 0.09$ | $7.98 \pm 0.09^*$    | $7.77 \pm 0.09$ | $7.92 \pm 0.09$      | $8.07 \pm 0.09^{**}$ | 310 |
| $4 \leq \Delta T_d < 6$             | $7.16 \pm 0.65$           | $7.43 \pm 0.15$ | $7.71 \pm 0.15^*$    | $7.57 \pm 0.15$ | $7.83 \pm 0.14^{**}$ | $8.10 \pm 0.14^{**}$ | 186 |
| $\Delta T_d \geq 6$                 | $6.96 \pm 0.13$           | $7.25 \pm 0.13$ | $7.55 \pm 0.13^{**}$ | $7.18 \pm 0.11$ | $7.40 \pm 0.11^*$    | $7.62 \pm 0.12^{**}$ | 258 |

Note: \*Passed the significance test of 0.05 level, \*\*Passed the significance test of 0.01 level.

**Table S19.** Meteoric water line of monthly-weighted samples for four seasons in Lanzhou City during 2011–2014. The monthly isotopic data during 1985–1987 and 1996–1999 was provided by IAEA/WMO (2017), and the event-based data during 2011–2014 were precipitation-weighted to monthly series.

|                           | OLSR            | RMA             | MA              | PWLSR           | PWRMA           | PWMA            |
|---------------------------|-----------------|-----------------|-----------------|-----------------|-----------------|-----------------|
| $a + \sigma_a$            | $7.40 \pm 0.13$ | $7.60 \pm 0.13$ | $7.80 \pm 0.49$ | $7.40 \pm 0.15$ | $7.67 \pm 0.57$ | $7.94 \pm 0.59$ |
| $(b + \sigma_b)/\text{‰}$ | $5.94 \pm 1.11$ | $7.39 \pm 1.11$ | $8.84 \pm 4.14$ | $6.05 \pm 1.11$ | $7.82 \pm 4.11$ | $9.59 \pm 4.36$ |
| rmSSE <sub>av</sub>       | 1               | 1.0155          | 1.0311          | 1               | 1.0209          | 1.042           |

**Table S20.** Inter-annual variation of slope of the  $\delta^2\text{H}$ – $\delta^{18}\text{O}$  linear relationship (in permille/permille) using the six regression methods, precipitation amount ( $P$  in mm) and air temperature ( $T$  in  $^{\circ}\text{C}$ ) based on event-based samples at Yuzhong in summer from 2011 to 2014.

| Year | Summer Slope (permille/permille) |                 |                 |                 |                 |                 | P (mm) | T ( $^{\circ}\text{C}$ ) |
|------|----------------------------------|-----------------|-----------------|-----------------|-----------------|-----------------|--------|--------------------------|
|      | OLSR                             | RMA             | MA              | PWLSR           | PWRMA           | PWMA            |        |                          |
| 2011 | $7.77 \pm 0.21$                  | $7.84 \pm 0.21$ | $7.91 \pm 0.22$ | $7.50 \pm 0.21$ | $7.56 \pm 0.21$ | $7.63 \pm 0.21$ | 105    | 17.80                    |
| 2012 | $7.87 \pm 0.29$                  | $8.00 \pm 0.28$ | $8.12 \pm 0.29$ | $7.82 \pm 0.34$ | $7.99 \pm 0.34$ | $8.17 \pm 0.35$ | 187.60 | 18.20                    |
| 2013 | $6.44 \pm 0.52$                  | $6.94 \pm 0.50$ | $7.45 \pm 0.55$ | $6.71 \pm 0.60$ | $7.36 \pm 0.62$ | $8.04 \pm 0.66$ | 115.60 | 16.88                    |
| 2014 | $6.79 \pm 0.63$                  | $7.21 \pm 0.59$ | $7.65 \pm 0.67$ | $7.97 \pm 0.60$ | $8.30 \pm 0.61$ | $8.64 \pm 0.62$ | 133.10 | 16.05                    |

**Table S21.** Inter-annual variation of slope of the  $\delta^2\text{H}$ – $\delta^{18}\text{O}$  linear relationship (in permille/permille) using the six regression methods, precipitation amount ( $P$  in mm) and air temperature ( $T$  in  $^{\circ}\text{C}$ ) based on event-based samples at Gaolan in summer from 2011 to 2014.

| Year | Summer Slope (permille/permille) |                 |                 |                 |                 |                   | P (mm) | T ( $^{\circ}\text{C}$ ) |
|------|----------------------------------|-----------------|-----------------|-----------------|-----------------|-------------------|--------|--------------------------|
|      | OLSR                             | RMA             | MA              | PWLSR           | PWRMA           | PWMA              |        |                          |
| 2011 | $7.81 \pm 0.54$                  | $8.12 \pm 0.51$ | $8.44 \pm 0.56$ | $8.56 \pm 0.39$ | $8.71 \pm 0.39$ | $8.85 \pm 0.40$   | 60.80  | 17.98                    |
| 2012 | $7.87 \pm 0.32$                  | $7.29 \pm 0.31$ | $7.69 \pm 0.33$ | $7.31 \pm 0.31$ | $7.65 \pm 0.40$ | $8.00 \pm 0.46^*$ | 112.80 | 20.08                    |
| 2013 | $7.46 \pm 0.38$                  | $7.77 \pm 0.36$ | $8.07 \pm 0.39$ | $7.21 \pm 0.47$ | $7.70 \pm 0.48$ | $8.21 \pm 0.50$   | 80.40  | 18.93                    |
| 2014 | $7.22 \pm 0.53$                  | $7.58 \pm 0.51$ | $7.95 \pm 0.56$ | $7.28 \pm 0.65$ | $7.82 \pm 0.67$ | $8.38 \pm 0.70$   | 51.60  | 18.36                    |

**Table S22.** Inter-annual variation of slope of the  $\delta^2\text{H}$ – $\delta^{18}\text{O}$  linear relationship (in permille/permille) using the six regression methods, precipitation amount ( $P$  in mm) and air temperature ( $T$  in  $^{\circ}\text{C}$ ) based on event-based samples at Yongdeng in summer from 2011 to 2014.

| Year | Summer Slope (permille/permille) |                 |                 |                 |                 |                   | P (mm) | T ( $^{\circ}\text{C}$ ) |
|------|----------------------------------|-----------------|-----------------|-----------------|-----------------|-------------------|--------|--------------------------|
|      | OLSR                             | RMA             | MA              | PWLSR           | PWRMA           | PWMA              |        |                          |
| 2011 | $6.88 \pm 0.33$                  | $7.04 \pm 0.23$ | $7.19 \pm 0.24$ | $7.16 \pm 0.19$ | $7.26 \pm 0.19$ | $7.36 \pm 0.20$   | 158.10 | 15.66                    |
| 2012 | $7.18 \pm 0.41$                  | $7.47 \pm 0.39$ | $7.76 \pm 0.43$ | $7.56 \pm 0.31$ | $7.72 \pm 0.31$ | $7.88 \pm 0.32$   | 187.20 | 16.81                    |
| 2013 | $7.39 \pm 0.28$                  | $7.51 \pm 0.27$ | $7.63 \pm 0.28$ | $7.67 \pm 0.22$ | $7.74 \pm 0.22$ | $7.81 \pm 0.22$   | 142.80 | 16.20                    |
| 2014 | $6.91 \pm 0.21$                  | $7.07 \pm 0.20$ | $7.23 \pm 0.21$ | $7.31 \pm 0.22$ | $7.50 \pm 0.23$ | $7.68 \pm 0.23^*$ | 166.10 | 15.30                    |
